# Supplementary material
Source: publisher figshare collection journal article supplement (https://acs.figshare.com/ndownloader/files/5840982)
Supplement: Supplementary file 1 [file 5840982]

 
data_compound(2b)
 
_audit_creation_method            'manual editing of SHELXL template'

_publ_contact_author_name         'Dr Frederick G. West'
_publ_contact_author_address
; Department of Chemistry
  University of Alberta
  Edmonton, Alberta T6G 2G2
  Canada
;
_publ_contact_author_email        frederick.west@ualberta.ca
_publ_contact_author_fax          '1(780)4928231'
_publ_contact_author_phone        '1(780)4928187'
_publ_contact_letter
; To: Cambridge Crystallographic Data Centre
  Please accept the following CIF data for a structure featured in
  a manuscript being submitted to Organic Letters.  Please forward
  any questions concerning this CIF to Frederick G. West
  (frederick.west@ualberta.ca).
;
_publ_requested_journal
 'Organic Letters'
_publ_section_title
; A formal intermolecular 4+4 approach to cyclooctanoids: 4+3 capture
  of the Nazarov oxyallyl intermediate with simple 1,3-dienes
;
loop_
_publ_author_name
_publ_author_footnote
_publ_author_address
 'Wang, Yong' .
; University of Utah
  Department of Chemistry
  315 So. 1400 E. Rm. 2020
  Salt Lake City, Utah 84112-0850
  U.S.A.
;
 'Schill, Brenden D.' .
; University of Utah
  Department of Chemistry
  315 So. 1400 E. Rm. 2020
  Salt Lake City, Utah 84112-0850
  U.S.A.
;
 'Arif, Atta M.' .
; University of Utah
  Department of Chemistry
  315 So. 1400 E. Rm. 2020
  Salt Lake City, Utah 84112-0850
  U.S.A.
;
 'West, Frederick G.' .
; Department of Chemistry
  University of Alberta
  Edmonton, Alberta T6G 2G2
  Canada
;
_chemical_formula_sum             'C17 H18 O2'
_chemical_formula_weight          254.31
 
loop_
 _atom_type_symbol
 _atom_type_description
 _atom_type_scat_dispersion_real
 _atom_type_scat_dispersion_imag
 _atom_type_scat_source
 'C'  'C'   0.0033   0.0016
 'International Tables Vol C Tables 4.2.6.8 and 6.1.1.4'
 'H'  'H'   0.0000   0.0000
 'International Tables Vol C Tables 4.2.6.8 and 6.1.1.4'
 'O'  'O'   0.0106   0.0060
 'International Tables Vol C Tables 4.2.6.8 and 6.1.1.4'
 
_symmetry_cell_setting            monoclinic
_symmetry_space_group_name_H-M    'P 21/a'
 
loop_
 _symmetry_equiv_pos_as_xyz
 'x, y, z'
 '-x+1/2, y+1/2, -z'
 '-x, -y, -z'
 'x-1/2, -y-1/2, z'
 
_cell_length_a                    7.7700(2)
_cell_length_b                    20.7979(7)
_cell_length_c                    8.2851(2)
_cell_angle_alpha                 90.00
_cell_angle_beta                  96.5442(19)
_cell_angle_gamma                 90.00
_cell_volume                      1330.15(6)
_cell_formula_units_Z             4
_cell_measurement_temperature     200(1)
_cell_measurement_reflns_used     3063
_cell_measurement_theta_min       1.018
_cell_measurement_theta_max       27.878
 
_exptl_crystal_description        prism
_exptl_crystal_colour             colorless
_exptl_crystal_size_max           0.33
_exptl_crystal_size_mid           0.28
_exptl_crystal_size_min           0.15
_exptl_crystal_density_meas       ?
_exptl_crystal_density_diffrn     1.270
_exptl_crystal_density_method     'not measured'
_exptl_crystal_F_000              544
_exptl_absorpt_coefficient_mu     0.082
_exptl_absorpt_correction_type    Multi-scan
_exptl_absorpt_correction_T_min   0.9735
_exptl_absorpt_correction_T_max   0.9878
_exptl_absorpt_process_details    'DENZO-SMN (Otwinowski & Minor, 1997)'
 
_exptl_special_details
;
 The program Denzo-SMN (Otwinowski & Minor, 1997) uses a scaling
 algorithm (Fox & Holmes, 1966) which effectively corrects for
 absorption effects. High redundancy data were used in the scaling
 program hence the 'multi-scan' code word was used. No transmission
 coefficients are available from the program (only scale factors for each
 frame). The scale factors in the experimental table are calculated
 from the 'size' command in the SHELXL-97 input file.
;
 
_diffrn_ambient_temperature       200(1)
_diffrn_radiation_wavelength      0.71073
_diffrn_radiation_type            MoK\a
_diffrn_radiation_source          'fine-focus sealed tube'
_diffrn_radiation_monochromator   graphite
_diffrn_measurement_device_type   'Nonius KappaCCD Diffractometer'
_diffrn_measurement_method        'Phi plus Omega scan'
_diffrn_detector_area_resol_mean  ?
_diffrn_standards_number          ?
_diffrn_standards_interval_count  ?
_diffrn_standards_interval_time   ?
_diffrn_standards_decay_%         ?
_diffrn_reflns_number             3149
_diffrn_reflns_av_R_equivalents   0.0000
_diffrn_reflns_av_sigmaI/netI     0.0311
_diffrn_reflns_limit_h_min        0
_diffrn_reflns_limit_h_max        10
_diffrn_reflns_limit_k_min        0
_diffrn_reflns_limit_k_max        27
_diffrn_reflns_limit_l_min        -10
_diffrn_reflns_limit_l_max        10
_diffrn_reflns_theta_min          4.50
_diffrn_reflns_theta_max          27.90
_reflns_number_total              3149
_reflns_number_gt                 2564
_reflns_threshold_expression      I>2\s(I)
 
_computing_data_collection        'Nonius COLLECT'
_computing_cell_refinement        DENZO-SMN
_computing_data_reduction         DENZO-SMN
_computing_structure_solution     SIR97
_computing_structure_refinement   'SHELXL-97 (Sheldrick, 1997)'
_computing_molecular_graphics     'WinGX, Ortep3'
_computing_publication_material   ?
 
_refine_special_details
;
 Refinement of F^2^ against ALL reflections.  The weighted R-factor wR and
 goodness of fit S are based on F^2^, conventional R-factors R are based
 on F, with F set to zero for negative F^2^. The threshold expression of
 F^2^ > 2sigma(F^2^) is used only for calculating R-factors(gt) etc. and is
 not relevant to the choice of reflections for refinement.  R-factors based
 on F^2^ are statistically about twice as large as those based on F, and R-
 factors based on ALL data will be even larger.
;
 
_refine_ls_structure_factor_coef  Fsqd
_refine_ls_matrix_type            full
_refine_ls_weighting_scheme       calc
_refine_ls_weighting_details
 'calc w=1/[\s^2^(Fo^2^)+(0.0540P)^2^+0.3099P] where P=(Fo^2^+2Fc^2^)/3'
_atom_sites_solution_primary      direct
_atom_sites_solution_secondary    difmap
_atom_sites_solution_hydrogens    geom
_refine_ls_hydrogen_treatment     mixed
_refine_ls_extinction_method      none
_refine_ls_extinction_coef        ?
_refine_ls_number_reflns          3149
_refine_ls_number_parameters      244
_refine_ls_number_restraints      0
_refine_ls_R_factor_all           0.0555
_refine_ls_R_factor_gt            0.0438
_refine_ls_wR_factor_ref          0.1182
_refine_ls_wR_factor_gt           0.1102
_refine_ls_goodness_of_fit_ref    1.033
_refine_ls_restrained_S_all       1.033
_refine_ls_shift/su_max           0.000
_refine_ls_shift/su_mean          0.000
 
loop_
 _atom_site_label
 _atom_site_type_symbol
 _atom_site_fract_x
 _atom_site_fract_y
 _atom_site_fract_z
 _atom_site_U_iso_or_equiv
 _atom_site_adp_type
 _atom_site_occupancy
 _atom_site_symmetry_multiplicity
 _atom_site_calc_flag
 _atom_site_refinement_flags
 _atom_site_disorder_assembly
 _atom_site_disorder_group
C1 C 0.32634(17) 0.09709(6) 0.26945(14) 0.0348(3) Uani 1 1 d . . .
C2 C 0.4263(2) 0.15556(7) 0.34771(16) 0.0393(3) Uani 1 1 d . . .
C3 C 0.33880(17) 0.17343(6) 0.50371(15) 0.0332(3) Uani 1 1 d . . .
C4 C 0.19156(15) 0.12196(6) 0.50969(14) 0.0304(3) Uani 1 1 d . . .
C5 C 0.02954(18) 0.14446(7) 0.39030(16) 0.0391(3) Uani 1 1 d . . .
C6 C -0.06530(19) 0.08663(8) 0.31333(18) 0.0446(3) Uani 1 1 d . . .
C7 C 0.0091(2) 0.07301(8) 0.18046(18) 0.0487(4) Uani 1 1 d . . .
C8 C 0.1532(2) 0.12124(7) 0.17009(16) 0.0434(3) Uani 1 1 d . . .
C9 C 0.4261(2) 0.05210(8) 0.16975(19) 0.0458(4) Uani 1 1 d . . .
C10 C 0.26814(15) 0.06685(6) 0.42141(14) 0.0297(3) Uani 1 1 d . . .
C11 C 0.13635(19) 0.10459(7) 0.67394(16) 0.0375(3) Uani 1 1 d . . .
C12 C 0.46097(16) 0.17499(6) 0.65958(15) 0.0321(3) Uani 1 1 d . . .
C13 C 0.58988(18) 0.12900(7) 0.69798(17) 0.0381(3) Uani 1 1 d . . .
C14 C 0.69094(18) 0.13028(7) 0.84761(17) 0.0414(3) Uani 1 1 d . . .
C15 C 0.66411(19) 0.17671(7) 0.96182(17) 0.0420(3) Uani 1 1 d . . .
C16 C 0.53712(19) 0.22251(7) 0.92503(16) 0.0404(3) Uani 1 1 d . . .
C17 C 0.43679(18) 0.22182(6) 0.77501(16) 0.0354(3) Uani 1 1 d . . .
O1 O 0.28554(12) 0.01158(4) 0.46554(11) 0.0391(2) Uani 1 1 d . . .
O2 O 0.09125(14) 0.17533(5) 0.25389(11) 0.0453(3) Uani 1 1 d . . .
H2A H 0.417(2) 0.1930(9) 0.273(2) 0.055(5) Uiso 1 1 d . . .
H2B H 0.549(2) 0.1435(8) 0.3782(19) 0.043(4) Uiso 1 1 d . . .
H3 H 0.2817(18) 0.2153(7) 0.4902(17) 0.035(4) Uiso 1 1 d . . .
H5 H -0.039(2) 0.1767(8) 0.4466(19) 0.048(4) Uiso 1 1 d . . .
H6 H -0.153(2) 0.0620(9) 0.365(2) 0.055(5) Uiso 1 1 d . . .
H7 H -0.010(2) 0.0367(9) 0.110(2) 0.060(5) Uiso 1 1 d . . .
H8 H 0.179(2) 0.1363(8) 0.063(2) 0.053(5) Uiso 1 1 d . . .
H9A H 0.350(2) 0.0174(9) 0.127(2) 0.060(5) Uiso 1 1 d . . .
H9B H 0.468(2) 0.0753(9) 0.078(2) 0.060(5) Uiso 1 1 d . . .
H9C H 0.529(3) 0.0324(9) 0.237(2) 0.066(6) Uiso 1 1 d . . .
H11A H 0.041(2) 0.0746(8) 0.6583(19) 0.047(4) Uiso 1 1 d . . .
H11B H 0.098(2) 0.1440(9) 0.731(2) 0.062(5) Uiso 1 1 d . . .
H11C H 0.233(2) 0.0848(8) 0.743(2) 0.049(4) Uiso 1 1 d . . .
H13 H 0.609(2) 0.0956(8) 0.620(2) 0.048(4) Uiso 1 1 d . . .
H14 H 0.777(2) 0.0980(8) 0.871(2) 0.051(5) Uiso 1 1 d . . .
H15 H 0.737(2) 0.1777(8) 1.066(2) 0.053(5) Uiso 1 1 d . . .
H16 H 0.515(2) 0.2557(8) 1.0030(19) 0.046(4) Uiso 1 1 d . . .
H17 H 0.3452(19) 0.2532(7) 0.7529(18) 0.039(4) Uiso 1 1 d . . .
 
loop_
 _atom_site_aniso_label
 _atom_site_aniso_U_11
 _atom_site_aniso_U_22
 _atom_site_aniso_U_33
 _atom_site_aniso_U_23
 _atom_site_aniso_U_13
 _atom_site_aniso_U_12
C1 0.0457(7) 0.0326(7) 0.0274(6) -0.0007(5) 0.0097(5) -0.0021(5)
C2 0.0517(8) 0.0362(7) 0.0319(6) -0.0009(5) 0.0126(6) -0.0079(6)
C3 0.0434(7) 0.0265(6) 0.0302(6) -0.0008(5) 0.0071(5) -0.0007(5)
C4 0.0347(6) 0.0292(6) 0.0276(6) 0.0012(4) 0.0050(4) 0.0021(5)
C5 0.0422(7) 0.0376(7) 0.0371(7) 0.0042(5) 0.0023(5) 0.0087(6)
C6 0.0385(7) 0.0483(8) 0.0443(8) 0.0042(6) -0.0064(6) 0.0022(6)
C7 0.0543(9) 0.0487(9) 0.0392(8) -0.0024(6) -0.0109(6) 0.0021(7)
C8 0.0614(9) 0.0410(8) 0.0273(6) 0.0022(5) 0.0026(6) 0.0039(7)
C9 0.0571(9) 0.0446(9) 0.0392(8) -0.0075(6) 0.0206(7) -0.0044(7)
C10 0.0310(6) 0.0300(6) 0.0282(6) 0.0003(5) 0.0034(4) -0.0006(5)
C11 0.0409(7) 0.0406(8) 0.0326(7) 0.0010(5) 0.0114(5) 0.0003(6)
C12 0.0371(6) 0.0281(6) 0.0321(6) -0.0017(5) 0.0078(5) -0.0043(5)
C13 0.0431(7) 0.0312(7) 0.0413(7) -0.0028(5) 0.0100(5) 0.0002(5)
C14 0.0383(7) 0.0380(8) 0.0483(8) 0.0086(6) 0.0063(6) 0.0000(6)
C15 0.0421(7) 0.0467(8) 0.0366(7) 0.0047(6) 0.0025(5) -0.0126(6)
C16 0.0474(8) 0.0397(7) 0.0350(7) -0.0067(5) 0.0093(5) -0.0088(6)
C17 0.0399(7) 0.0306(7) 0.0365(6) -0.0039(5) 0.0084(5) -0.0010(5)
O1 0.0468(5) 0.0293(5) 0.0425(5) 0.0041(4) 0.0112(4) 0.0046(4)
O2 0.0625(7) 0.0369(6) 0.0357(5) 0.0072(4) 0.0023(4) 0.0089(5)
 
_geom_special_details
;
 All esds (except the esd in the dihedral angle between two l.s. planes)
 are estimated using the full covariance matrix.  The cell esds are taken
 into account individually in the estimation of esds in distances, angles
 and torsion angles; correlations between esds in cell parameters are only
 used when they are defined by crystal symmetry.  An approximate (isotropic)
 treatment of cell esds is used for estimating esds involving l.s. planes.
;
 
loop_
 _geom_bond_atom_site_label_1
 _geom_bond_atom_site_label_2
 _geom_bond_distance
 _geom_bond_site_symmetry_2
 _geom_bond_publ_flag
C1 C9 1.5178(19) . ?
C1 C10 1.5215(16) . ?
C1 C2 1.5455(19) . ?
C1 C8 1.577(2) . ?
C2 C3 1.5721(17) . ?
C2 H2A 0.993(18) . ?
C2 H2B 0.994(16) . ?
C3 C12 1.5135(18) . ?
C3 C4 1.5717(18) . ?
C3 H3 0.978(15) . ?
C4 C11 1.5163(17) . ?
C4 C10 1.5172(16) . ?
C4 C5 1.5807(17) . ?
C5 O2 1.4293(16) . ?
C5 C6 1.513(2) . ?
C5 H5 1.001(16) . ?
C6 C7 1.331(2) . ?
C6 H6 0.990(18) . ?
C7 C8 1.513(2) . ?
C7 H7 0.955(19) . ?
C8 O2 1.4336(17) . ?
C8 H8 0.985(17) . ?
C9 H9A 0.972(19) . ?
C9 H9B 0.988(19) . ?
C9 H9C 1.01(2) . ?
C10 O1 1.2091(15) . ?
C11 H11A 0.968(17) . ?
C11 H11B 1.01(2) . ?
C11 H11C 0.983(18) . ?
C12 C17 1.3926(17) . ?
C12 C13 1.3954(18) . ?
C13 C14 1.390(2) . ?
C13 H13 0.973(17) . ?
C14 C15 1.384(2) . ?
C14 H14 0.952(18) . ?
C15 C16 1.380(2) . ?
C15 H15 0.978(17) . ?
C16 C17 1.3900(19) . ?
C16 H16 0.975(16) . ?
C17 H17 0.967(15) . ?
 
loop_
 _geom_angle_atom_site_label_1
 _geom_angle_atom_site_label_2
 _geom_angle_atom_site_label_3
 _geom_angle
 _geom_angle_site_symmetry_1
 _geom_angle_site_symmetry_3
 _geom_angle_publ_flag
C9 C1 C10 114.45(11) . . ?
C9 C1 C2 116.74(12) . . ?
C10 C1 C2 99.25(9) . . ?
C9 C1 C8 111.73(11) . . ?
C10 C1 C8 104.31(10) . . ?
C2 C1 C8 109.06(11) . . ?
C1 C2 C3 106.67(10) . . ?
C1 C2 H2A 111.0(10) . . ?
C3 C2 H2A 108.8(10) . . ?
C1 C2 H2B 109.3(9) . . ?
C3 C2 H2B 110.2(9) . . ?
H2A C2 H2B 110.7(13) . . ?
C12 C3 C4 112.07(10) . . ?
C12 C3 C2 114.74(11) . . ?
C4 C3 C2 104.46(10) . . ?
C12 C3 H3 108.1(8) . . ?
C4 C3 H3 106.7(8) . . ?
C2 C3 H3 110.4(8) . . ?
C11 C4 C10 114.79(11) . . ?
C11 C4 C3 118.16(10) . . ?
C10 C4 C3 99.93(9) . . ?
C11 C4 C5 110.21(10) . . ?
C10 C4 C5 104.48(10) . . ?
C3 C4 C5 108.01(10) . . ?
O2 C5 C6 102.41(11) . . ?
O2 C5 C4 108.23(10) . . ?
C6 C5 C4 110.08(11) . . ?
O2 C5 H5 108.1(9) . . ?
C6 C5 H5 118.1(9) . . ?
C4 C5 H5 109.4(9) . . ?
C7 C6 C5 106.33(14) . . ?
C7 C6 H6 129.3(10) . . ?
C5 C6 H6 123.8(10) . . ?
C6 C7 C8 107.45(14) . . ?
C6 C7 H7 128.4(11) . . ?
C8 C7 H7 123.7(11) . . ?
O2 C8 C7 101.62(12) . . ?
O2 C8 C1 108.10(10) . . ?
C7 C8 C1 110.60(11) . . ?
O2 C8 H8 107.6(10) . . ?
C7 C8 H8 119.5(10) . . ?
C1 C8 H8 108.7(10) . . ?
C1 C9 H9A 109.0(11) . . ?
C1 C9 H9B 110.6(11) . . ?
H9A C9 H9B 109.1(15) . . ?
C1 C9 H9C 111.7(11) . . ?
H9A C9 H9C 107.9(15) . . ?
H9B C9 H9C 108.5(15) . . ?
O1 C10 C4 127.51(11) . . ?
O1 C10 C1 127.56(11) . . ?
C4 C10 C1 104.87(10) . . ?
C4 C11 H11A 109.0(9) . . ?
C4 C11 H11B 110.7(11) . . ?
H11A C11 H11B 108.9(14) . . ?
C4 C11 H11C 110.4(9) . . ?
H11A C11 H11C 109.4(13) . . ?
H11B C11 H11C 108.4(14) . . ?
C17 C12 C13 118.19(12) . . ?
C17 C12 C3 118.71(12) . . ?
C13 C12 C3 122.95(11) . . ?
C14 C13 C12 120.54(13) . . ?
C14 C13 H13 119.7(9) . . ?
C12 C13 H13 119.8(9) . . ?
C15 C14 C13 120.61(14) . . ?
C15 C14 H14 120.8(10) . . ?
C13 C14 H14 118.6(10) . . ?
C16 C15 C14 119.34(13) . . ?
C16 C15 H15 120.4(10) . . ?
C14 C15 H15 120.2(10) . . ?
C15 C16 C17 120.28(13) . . ?
C15 C16 H16 121.3(9) . . ?
C17 C16 H16 118.4(9) . . ?
C16 C17 C12 121.03(13) . . ?
C16 C17 H17 119.2(9) . . ?
C12 C17 H17 119.7(9) . . ?
C5 O2 C8 101.06(10) . . ?
 
loop_
 _geom_torsion_atom_site_label_1
 _geom_torsion_atom_site_label_2
 _geom_torsion_atom_site_label_3
 _geom_torsion_atom_site_label_4
 _geom_torsion
 _geom_torsion_site_symmetry_1
 _geom_torsion_site_symmetry_2
 _geom_torsion_site_symmetry_3
 _geom_torsion_site_symmetry_4
 _geom_torsion_publ_flag
C9 C1 C2 C3 -152.60(12) . . . . ?
C10 C1 C2 C3 -29.12(13) . . . . ?
C8 C1 C2 C3 79.62(13) . . . . ?
C1 C2 C3 C12 124.38(12) . . . . ?
C1 C2 C3 C4 1.29(14) . . . . ?
C12 C3 C4 C11 27.63(15) . . . . ?
C2 C3 C4 C11 152.44(12) . . . . ?
C12 C3 C4 C10 -97.59(11) . . . . ?
C2 C3 C4 C10 27.23(12) . . . . ?
C12 C3 C4 C5 153.51(10) . . . . ?
C2 C3 C4 C5 -81.67(12) . . . . ?
C11 C4 C5 O2 165.57(11) . . . . ?
C10 C4 C5 O2 -70.60(12) . . . . ?
C3 C4 C5 O2 35.14(13) . . . . ?
C11 C4 C5 C6 -83.24(14) . . . . ?
C10 C4 C5 C6 40.58(14) . . . . ?
C3 C4 C5 C6 146.32(11) . . . . ?
O2 C5 C6 C7 26.97(14) . . . . ?
C4 C5 C6 C7 -87.96(14) . . . . ?
C5 C6 C7 C8 0.37(15) . . . . ?
C6 C7 C8 O2 -27.42(14) . . . . ?
C6 C7 C8 C1 87.16(14) . . . . ?
C9 C1 C8 O2 -164.92(11) . . . . ?
C10 C1 C8 O2 70.92(13) . . . . ?
C2 C1 C8 O2 -34.37(14) . . . . ?
C9 C1 C8 C7 84.64(14) . . . . ?
C10 C1 C8 C7 -39.52(14) . . . . ?
C2 C1 C8 C7 -144.81(12) . . . . ?
C11 C4 C10 O1 1.85(18) . . . . ?
C3 C4 C10 O1 129.34(13) . . . . ?
C5 C4 C10 O1 -118.98(14) . . . . ?
C11 C4 C10 C1 -175.41(11) . . . . ?
C3 C4 C10 C1 -47.92(11) . . . . ?
C5 C4 C10 C1 63.76(12) . . . . ?
C9 C1 C10 O1 -3.66(19) . . . . ?
C2 C1 C10 O1 -128.75(14) . . . . ?
C8 C1 C10 O1 118.74(14) . . . . ?
C9 C1 C10 C4 173.60(11) . . . . ?
C2 C1 C10 C4 48.51(12) . . . . ?
C8 C1 C10 C4 -64.00(12) . . . . ?
C4 C3 C12 C17 -98.38(14) . . . . ?
C2 C3 C12 C17 142.70(12) . . . . ?
C4 C3 C12 C13 77.20(15) . . . . ?
C2 C3 C12 C13 -41.72(17) . . . . ?
C17 C12 C13 C14 -0.1(2) . . . . ?
C3 C12 C13 C14 -175.66(12) . . . . ?
C12 C13 C14 C15 0.8(2) . . . . ?
C13 C14 C15 C16 -0.9(2) . . . . ?
C14 C15 C16 C17 0.3(2) . . . . ?
C15 C16 C17 C12 0.5(2) . . . . ?
C13 C12 C17 C16 -0.55(19) . . . . ?
C3 C12 C17 C16 175.24(12) . . . . ?
C6 C5 O2 C8 -43.53(12) . . . . ?
C4 C5 O2 C8 72.74(12) . . . . ?
C7 C8 O2 C5 43.40(12) . . . . ?
C1 C8 O2 C5 -73.03(12) . . . . ?
 
_diffrn_measured_fraction_theta_max    0.993
_diffrn_reflns_theta_full              27.90
_diffrn_measured_fraction_theta_full   0.993
_refine_diff_density_max    0.293
_refine_diff_density_min   -0.179
_refine_diff_density_rms    0.035

#===END
 
data_compound(4a)
 
_audit_creation_method            'manual editing of SHELXL template'

_publ_contact_author_name         'Dr Frederick G. West'
_publ_contact_author_address
; Department of Chemistry
  University of Alberta
  Edmonton, Alberta T6G 2G2
  Canada
;
_publ_contact_author_email        frederick.west@ualberta.ca
_publ_contact_author_fax          '1(780)4928231'
_publ_contact_author_phone        '1(780)4928187'
_publ_contact_letter
; To: Cambridge Crystallographic Data Centre
  Please accept the following CIF data for a structure featured in
  a manuscript being submitted to Organic Letters.  Please forward
  any questions concerning this CIF to Frederick G. West
  (frederick.west@ualberta.ca).
;
_publ_requested_journal
 'Organic Letters'
_publ_section_title
; A formal intermolecular 4+4 approach to cyclooctanoids: 4+3 capture
  of the Nazarov oxyallyl intermediate with simple 1,3-dienes
;
loop_
_publ_author_name
_publ_author_footnote
_publ_author_address
 'Wang, Yong' .
; University of Utah
  Department of Chemistry
  315 So. 1400 E. Rm. 2020
  Salt Lake City, Utah 84112-0850
  U.S.A.
;
 'Schill, Brenden D.' .
; University of Utah
  Department of Chemistry
  315 So. 1400 E. Rm. 2020
  Salt Lake City, Utah 84112-0850
  U.S.A.
;
 'Arif, Atta M.' .
; University of Utah
  Department of Chemistry
  315 So. 1400 E. Rm. 2020
  Salt Lake City, Utah 84112-0850
  U.S.A.
;
 'West, Frederick G.' .
; Department of Chemistry
  University of Alberta
  Edmonton, Alberta T6G 2G2
  Canada
;
_chemical_formula_sum             'C24 H26 O'
_chemical_formula_weight          330.45
 
loop_
 _atom_type_symbol
 _atom_type_description
 _atom_type_scat_dispersion_real
 _atom_type_scat_dispersion_imag
 _atom_type_scat_source
 'C'  'C'   0.0033   0.0016
 'International Tables Vol C Tables 4.2.6.8 and 6.1.1.4'
 'H'  'H'   0.0000   0.0000
 'International Tables Vol C Tables 4.2.6.8 and 6.1.1.4'
 'O'  'O'   0.0106   0.0060
 'International Tables Vol C Tables 4.2.6.8 and 6.1.1.4'
 
_symmetry_cell_setting            monoclinic
_symmetry_space_group_name_H-M    'P 21/c'
 
loop_
 _symmetry_equiv_pos_as_xyz
 'x, y, z'
 '-x, y+1/2, -z+1/2'
 '-x, -y, -z'
 'x, -y-1/2, z-1/2'
 
_cell_length_a                    11.7960(4)
_cell_length_b                    10.0080(4)
_cell_length_c                    16.2016(4)
_cell_angle_alpha                 90.00
_cell_angle_beta                  100.637(2)
_cell_angle_gamma                 90.00
_cell_volume                      1879.80(11)
_cell_formula_units_Z             4
_cell_measurement_temperature     200(1)
_cell_measurement_reflns_used     3810
_cell_measurement_theta_min       1.018
_cell_measurement_theta_max       29.131
 
_exptl_crystal_description        prism
_exptl_crystal_colour             colorless
_exptl_crystal_size_max           0.25
_exptl_crystal_size_mid           0.18
_exptl_crystal_size_min           0.11
_exptl_crystal_density_meas       ?
_exptl_crystal_density_diffrn     1.168
_exptl_crystal_density_method     'not measured'
_exptl_crystal_F_000              712
_exptl_absorpt_coefficient_mu     0.069
_exptl_absorpt_correction_type    Multi-scan
_exptl_absorpt_correction_T_min   0.9829
_exptl_absorpt_correction_T_max   0.9924
_exptl_absorpt_process_details    'DENZO-SMN (Otwinowski & Minor, 1997)'
 
_exptl_special_details
;
 The program Denzo-SMN (Otwinowski & Minor, 1997) uses a scaling
 algorithm (Fox & Holmes, 1966) which effectively corrects for
 absorption effects. High redundancy data were used in the scaling
 program hence the 'multi-scan' code word was used. No transmission
 coefficients are available from the program (only scale factors for each
 frame). The scale factors in the experimental table are calculated
 from the 'size' command in the SHELXL-97 input file.
;
 
_diffrn_ambient_temperature       200(1)
_diffrn_radiation_wavelength      0.71073
_diffrn_radiation_type            MoK\a
_diffrn_radiation_source          'fine-focus sealed tube'
_diffrn_radiation_monochromator   graphite
_diffrn_measurement_device_type   'Nonius KappaCCD Diffractometer'
_diffrn_measurement_method        'Phi plus Omega scan'
_diffrn_detector_area_resol_mean  ?
_diffrn_standards_number          ?
_diffrn_standards_interval_count  ?
_diffrn_standards_interval_time   ?
_diffrn_standards_decay_%         ?
_diffrn_reflns_number             7559
_diffrn_reflns_av_R_equivalents   0.0297
_diffrn_reflns_av_sigmaI/netI     0.0520
_diffrn_reflns_limit_h_min        -15
_diffrn_reflns_limit_h_max        14
_diffrn_reflns_limit_k_min        -13
_diffrn_reflns_limit_k_max        13
_diffrn_reflns_limit_l_min        -19
_diffrn_reflns_limit_l_max        19
_diffrn_reflns_theta_min          3.11
_diffrn_reflns_theta_max          29.12
_reflns_number_total              4587
_reflns_number_gt                 2854
_reflns_threshold_expression      I>2\s(I)
 
_computing_data_collection        'Nonius COLLECT'
_computing_cell_refinement        DENZO-SMN
_computing_data_reduction         DENZO-SMN
_computing_structure_solution     SIR97
_computing_structure_refinement   'SHELXL-97 (Sheldrick, 1997)'
_computing_molecular_graphics     'WinGX, Ortep3'
_computing_publication_material   ?
 
_refine_special_details
;
 Refinement of F^2^ against ALL reflections.  The weighted R-factor wR and
 goodness of fit S are based on F^2^, conventional R-factors R are based
 on F, with F set to zero for negative F^2^. The threshold expression of
 F^2^ > 2sigma(F^2^) is used only for calculating R-factors(gt) etc. and is
 not relevant to the choice of reflections for refinement.  R-factors based
 on F^2^ are statistically about twice as large as those based on F, and R-
 factors based on ALL data will be even larger.
;
 
_refine_ls_structure_factor_coef  Fsqd
_refine_ls_matrix_type            full
_refine_ls_weighting_scheme       calc
_refine_ls_weighting_details
 'calc w=1/[\s^2^(Fo^2^)+(0.0676P)^2^+0.5790P] where P=(Fo^2^+2Fc^2^)/3'
_atom_sites_solution_primary      direct
_atom_sites_solution_secondary    difmap
_atom_sites_solution_hydrogens    geom
_refine_ls_hydrogen_treatment     mixed
_refine_ls_extinction_method      SHELXL
_refine_ls_extinction_coef        0.033(5)
_refine_ls_extinction_expression
 'Fc^*^=kFc[1+0.001xFc^2^\l^3^/sin(2\q)]^-1/4^'
_refine_ls_number_reflns          4587
_refine_ls_number_parameters      331
_refine_ls_number_restraints      0
_refine_ls_R_factor_all           0.1079
_refine_ls_R_factor_gt            0.0621
_refine_ls_wR_factor_ref          0.1764
_refine_ls_wR_factor_gt           0.1481
_refine_ls_goodness_of_fit_ref    1.037
_refine_ls_restrained_S_all       1.037
_refine_ls_shift/su_max           0.000
_refine_ls_shift/su_mean          0.000
 
loop_
 _atom_site_label
 _atom_site_type_symbol
 _atom_site_fract_x
 _atom_site_fract_y
 _atom_site_fract_z
 _atom_site_U_iso_or_equiv
 _atom_site_adp_type
 _atom_site_occupancy
 _atom_site_symmetry_multiplicity
 _atom_site_calc_flag
 _atom_site_refinement_flags
 _atom_site_disorder_assembly
 _atom_site_disorder_group
O1 O 1.05566(13) 0.2864(2) 0.24439(10) 0.0819(6) Uani 1 1 d . . .
C1 C 0.90760(16) 0.2317(2) 0.12447(12) 0.0473(5) Uani 1 1 d . . .
C2 C 0.8571(2) 0.3649(2) 0.08547(16) 0.0576(6) Uani 1 1 d . . .
C3 C 0.8017(2) 0.4694(2) 0.1331(2) 0.0770(8) Uani 1 1 d . . .
C4 C 0.7948(3) 0.4761(3) 0.2161(3) 0.0919(11) Uani 1 1 d . . .
C5 C 0.8310(3) 0.3832(3) 0.2883(2) 0.0857(9) Uani 1 1 d . . .
C6 C 0.86203(18) 0.2428(2) 0.26709(13) 0.0582(6) Uani 1 1 d . . .
C7 C 0.75973(15) 0.1758(2) 0.20576(11) 0.0425(4) Uani 1 1 d . . .
C8 C 0.81643(15) 0.1237(2) 0.13418(11) 0.0410(4) Uani 1 1 d . . .
C9 C 0.95723(18) 0.2569(2) 0.21539(13) 0.0576(6) Uani 1 1 d . . .
C10 C 0.9973(2) 0.1823(3) 0.07510(16) 0.0589(6) Uani 1 1 d . . .
C11 C 0.7553(4) 0.5832(4) 0.0765(4) 0.1147(15) Uani 1 1 d . . .
C12 C 0.9069(2) 0.1591(4) 0.34644(15) 0.0801(9) Uani 1 1 d . . .
C13 C 0.69070(14) 0.07672(19) 0.24642(10) 0.0412(4) Uani 1 1 d . . .
C14 C 0.70012(17) -0.0610(2) 0.23838(13) 0.0502(5) Uani 1 1 d . . .
C15 C 0.6345(2) -0.1477(2) 0.27761(14) 0.0598(6) Uani 1 1 d . . .
C16 C 0.5599(2) -0.0984(3) 0.32624(15) 0.0638(6) Uani 1 1 d . . .
C17 C 0.5492(2) 0.0374(3) 0.33486(15) 0.0633(6) Uani 1 1 d . . .
C18 C 0.61311(18) 0.1247(2) 0.29498(13) 0.0530(5) Uani 1 1 d . . .
C19 C 0.73622(15) 0.08194(19) 0.05469(11) 0.0420(4) Uani 1 1 d . . .
C20 C 0.63978(17) 0.1549(2) 0.01859(12) 0.0506(5) Uani 1 1 d . . .
C21 C 0.56964(19) 0.1111(3) -0.05565(13) 0.0597(6) Uani 1 1 d . . .
C22 C 0.5956(2) -0.0043(3) -0.09389(14) 0.0645(7) Uani 1 1 d . . .
C23 C 0.6900(2) -0.0771(3) -0.05923(15) 0.0651(6) Uani 1 1 d . . .
C24 C 0.76019(19) -0.0352(2) 0.01435(13) 0.0525(5) Uani 1 1 d . . .
H2A H 0.798(2) 0.345(2) 0.0306(16) 0.074(7) Uiso 1 1 d . . .
H2B H 0.921(2) 0.416(3) 0.0713(14) 0.070(7) Uiso 1 1 d . . .
H4 H 0.758(2) 0.559(3) 0.2298(18) 0.094(9) Uiso 1 1 d . . .
H5A H 0.763(3) 0.373(4) 0.329(2) 0.132(12) Uiso 1 1 d . . .
H5B H 0.905(3) 0.422(3) 0.331(2) 0.107(10) Uiso 1 1 d . . .
H7 H 0.7084(16) 0.2482(19) 0.1821(11) 0.038(5) Uiso 1 1 d . . .
H8 H 0.8628(16) 0.044(2) 0.1556(11) 0.042(5) Uiso 1 1 d . . .
H10A H 0.962(2) 0.174(3) 0.0128(18) 0.082(8) Uiso 1 1 d . . .
H10B H 1.027(2) 0.094(3) 0.0942(15) 0.073(7) Uiso 1 1 d . . .
H10C H 1.062(2) 0.251(3) 0.0807(15) 0.078(7) Uiso 1 1 d . . .
H11A H 0.695(4) 0.545(4) 0.030(3) 0.140(16) Uiso 1 1 d . . .
H11B H 0.814(4) 0.612(4) 0.038(2) 0.135(13) Uiso 1 1 d . . .
H11C H 0.728(4) 0.665(5) 0.108(3) 0.158(15) Uiso 1 1 d . . .
H12A H 0.919(4) 0.048(5) 0.324(3) 0.160(16) Uiso 1 1 d . . .
H12B H 0.851(3) 0.168(3) 0.383(2) 0.112(11) Uiso 1 1 d . . .
H12C H 0.980(3) 0.209(3) 0.3743(19) 0.099(9) Uiso 1 1 d . . .
H14 H 0.7553(18) -0.100(2) 0.2021(13) 0.056(6) Uiso 1 1 d . . .
H15 H 0.647(2) -0.250(3) 0.2725(16) 0.081(8) Uiso 1 1 d . . .
H16 H 0.510(2) -0.161(3) 0.3532(16) 0.080(8) Uiso 1 1 d . . .
H17 H 0.499(2) 0.074(3) 0.3695(17) 0.080(7) Uiso 1 1 d . . .
H18 H 0.6049(18) 0.220(2) 0.2968(13) 0.059(6) Uiso 1 1 d . . .
H20 H 0.622(2) 0.240(3) 0.0451(14) 0.067(7) Uiso 1 1 d . . .
H21 H 0.503(2) 0.165(3) -0.0766(16) 0.077(8) Uiso 1 1 d . . .
H22 H 0.545(2) -0.039(3) -0.1435(17) 0.077(7) Uiso 1 1 d . . .
H23 H 0.706(2) -0.166(3) -0.0839(18) 0.093(9) Uiso 1 1 d . . .
H24 H 0.829(2) -0.088(2) 0.0399(14) 0.065(6) Uiso 1 1 d . . .
 
loop_
 _atom_site_aniso_label
 _atom_site_aniso_U_11
 _atom_site_aniso_U_22
 _atom_site_aniso_U_33
 _atom_site_aniso_U_23
 _atom_site_aniso_U_13
 _atom_site_aniso_U_12
O1 0.0513(9) 0.1181(16) 0.0729(11) -0.0022(10) 0.0028(8) -0.0337(10)
C1 0.0392(10) 0.0544(12) 0.0496(11) 0.0007(9) 0.0113(8) -0.0033(8)
C2 0.0517(12) 0.0483(12) 0.0739(15) 0.0011(10) 0.0144(11) -0.0061(10)
C3 0.0609(14) 0.0434(12) 0.132(3) -0.0033(14) 0.0315(15) -0.0060(11)
C4 0.0790(18) 0.0498(15) 0.158(3) -0.0405(19) 0.052(2) -0.0146(13)
C5 0.091(2) 0.077(2) 0.095(2) -0.0391(17) 0.0326(17) -0.0275(16)
C6 0.0526(12) 0.0746(15) 0.0484(11) -0.0176(10) 0.0122(9) -0.0189(10)
C7 0.0380(9) 0.0472(11) 0.0427(10) -0.0052(8) 0.0088(7) -0.0035(8)
C8 0.0358(9) 0.0455(10) 0.0421(9) -0.0006(8) 0.0080(7) 0.0020(8)
C9 0.0463(11) 0.0667(14) 0.0589(12) -0.0029(10) 0.0071(9) -0.0144(10)
C10 0.0473(12) 0.0666(15) 0.0670(15) 0.0115(12) 0.0216(10) 0.0063(11)
C11 0.092(2) 0.0593(19) 0.202(5) 0.024(2) 0.053(3) 0.0132(18)
C12 0.0594(15) 0.136(3) 0.0418(12) -0.0039(14) 0.0021(10) -0.0252(16)
C13 0.0345(9) 0.0510(11) 0.0377(9) -0.0008(8) 0.0052(7) 0.0009(8)
C14 0.0453(11) 0.0532(12) 0.0532(11) 0.0051(9) 0.0120(8) 0.0039(9)
C15 0.0624(13) 0.0557(14) 0.0632(13) 0.0114(11) 0.0168(10) 0.0034(11)
C16 0.0632(14) 0.0698(16) 0.0620(13) 0.0114(12) 0.0207(11) -0.0059(12)
C17 0.0575(13) 0.0787(17) 0.0603(13) -0.0010(12) 0.0281(11) -0.0020(11)
C18 0.0508(11) 0.0562(13) 0.0556(12) -0.0036(10) 0.0191(9) 0.0014(9)
C19 0.0411(9) 0.0466(10) 0.0393(9) 0.0014(8) 0.0099(7) -0.0033(8)
C20 0.0451(11) 0.0580(13) 0.0486(11) 0.0021(9) 0.0082(8) -0.0004(9)
C21 0.0456(12) 0.0798(17) 0.0511(12) 0.0130(11) 0.0024(9) -0.0099(11)
C22 0.0638(14) 0.0840(18) 0.0453(12) -0.0046(11) 0.0089(10) -0.0279(13)
C23 0.0767(16) 0.0629(15) 0.0573(13) -0.0139(11) 0.0165(11) -0.0164(12)
C24 0.0550(12) 0.0516(12) 0.0519(11) -0.0043(9) 0.0127(9) -0.0030(10)
 
_geom_special_details
;
 All esds (except the esd in the dihedral angle between two l.s. planes)
 are estimated using the full covariance matrix.  The cell esds are taken
 into account individually in the estimation of esds in distances, angles
 and torsion angles; correlations between esds in cell parameters are only
 used when they are defined by crystal symmetry.  An approximate (isotropic)
 treatment of cell esds is used for estimating esds involving l.s. planes.
;
 
loop_
 _geom_bond_atom_site_label_1
 _geom_bond_atom_site_label_2
 _geom_bond_distance
 _geom_bond_site_symmetry_2
 _geom_bond_publ_flag
O1 C9 1.206(2) . ?
C1 C9 1.503(3) . ?
C1 C10 1.522(3) . ?
C1 C2 1.547(3) . ?
C1 C8 1.553(3) . ?
C2 C3 1.517(4) . ?
C2 H2A 1.04(3) . ?
C2 H2B 0.98(3) . ?
C3 C4 1.364(5) . ?
C3 C11 1.501(5) . ?
C4 C5 1.494(5) . ?
C4 H4 0.98(3) . ?
C5 C6 1.508(4) . ?
C5 H5A 1.14(4) . ?
C5 H5B 1.09(3) . ?
C6 C9 1.527(3) . ?
C6 C12 1.544(4) . ?
C6 C7 1.565(3) . ?
C7 C13 1.509(3) . ?
C7 C8 1.533(3) . ?
C7 H7 0.977(19) . ?
C8 C19 1.509(2) . ?
C8 H8 0.99(2) . ?
C10 H10A 1.02(3) . ?
C10 H10B 0.98(3) . ?
C10 H10C 1.02(3) . ?
C11 H11A 1.01(4) . ?
C11 H11B 1.06(4) . ?
C11 H11C 1.05(5) . ?
C12 H12A 1.18(5) . ?
C12 H12B 0.96(4) . ?
C12 H12C 1.03(3) . ?
C13 C14 1.391(3) . ?
C13 C18 1.397(3) . ?
C14 C15 1.392(3) . ?
C14 H14 1.03(2) . ?
C15 C16 1.376(3) . ?
C15 H15 1.04(3) . ?
C16 C17 1.375(4) . ?
C16 H16 1.01(3) . ?
C17 C18 1.389(3) . ?
C17 H17 0.96(3) . ?
C18 H18 0.96(2) . ?
C19 C20 1.387(3) . ?
C19 C24 1.396(3) . ?
C20 C21 1.399(3) . ?
C20 H20 0.99(3) . ?
C21 C22 1.372(4) . ?
C21 H21 0.96(3) . ?
C22 C23 1.362(4) . ?
C22 H22 0.97(3) . ?
C23 C24 1.385(3) . ?
C23 H23 1.01(3) . ?
C24 H24 0.99(2) . ?
 
loop_
 _geom_angle_atom_site_label_1
 _geom_angle_atom_site_label_2
 _geom_angle_atom_site_label_3
 _geom_angle
 _geom_angle_site_symmetry_1
 _geom_angle_site_symmetry_3
 _geom_angle_publ_flag
C9 C1 C10 112.75(18) . . ?
C9 C1 C2 107.85(18) . . ?
C10 C1 C2 108.57(18) . . ?
C9 C1 C8 99.75(15) . . ?
C10 C1 C8 112.87(18) . . ?
C2 C1 C8 114.80(16) . . ?
C3 C2 C1 123.8(2) . . ?
C3 C2 H2A 106.2(14) . . ?
C1 C2 H2A 109.4(14) . . ?
C3 C2 H2B 100.6(15) . . ?
C1 C2 H2B 106.9(14) . . ?
H2A C2 H2B 109.1(19) . . ?
C4 C3 C11 119.0(3) . . ?
C4 C3 C2 130.1(3) . . ?
C11 C3 C2 110.8(3) . . ?
C3 C4 C5 133.0(3) . . ?
C3 C4 H4 112.0(17) . . ?
C5 C4 H4 115.0(17) . . ?
C4 C5 C6 116.6(2) . . ?
C4 C5 H5A 112.5(18) . . ?
C6 C5 H5A 106.1(19) . . ?
C4 C5 H5B 111.0(17) . . ?
C6 C5 H5B 106.3(17) . . ?
H5A C5 H5B 103(2) . . ?
C5 C6 C9 105.8(2) . . ?
C5 C6 C12 112.1(2) . . ?
C9 C6 C12 109.5(2) . . ?
C5 C6 C7 110.7(2) . . ?
C9 C6 C7 104.51(15) . . ?
C12 C6 C7 113.7(2) . . ?
C13 C7 C8 116.92(16) . . ?
C13 C7 C6 114.78(15) . . ?
C8 C7 C6 103.47(14) . . ?
C13 C7 H7 108.3(11) . . ?
C8 C7 H7 106.3(11) . . ?
C6 C7 H7 106.3(11) . . ?
C19 C8 C7 116.57(15) . . ?
C19 C8 C1 116.28(15) . . ?
C7 C8 C1 104.29(15) . . ?
C19 C8 H8 107.1(11) . . ?
C7 C8 H8 107.3(11) . . ?
C1 C8 H8 104.3(11) . . ?
O1 C9 C1 126.6(2) . . ?
O1 C9 C6 124.2(2) . . ?
C1 C9 C6 109.23(16) . . ?
C1 C10 H10A 110.4(15) . . ?
C1 C10 H10B 111.5(14) . . ?
H10A C10 H10B 107(2) . . ?
C1 C10 H10C 108.2(15) . . ?
H10A C10 H10C 108(2) . . ?
H10B C10 H10C 112(2) . . ?
C3 C11 H11A 107(2) . . ?
C3 C11 H11B 111(2) . . ?
H11A C11 H11B 97(3) . . ?
C3 C11 H11C 114(3) . . ?
H11A C11 H11C 115(3) . . ?
H11B C11 H11C 112(3) . . ?
C6 C12 H12A 108(2) . . ?
C6 C12 H12B 107(2) . . ?
H12A C12 H12B 114(3) . . ?
C6 C12 H12C 103.6(17) . . ?
H12A C12 H12C 117(3) . . ?
H12B C12 H12C 107(3) . . ?
C14 C13 C18 117.72(18) . . ?
C14 C13 C7 123.45(17) . . ?
C18 C13 C7 118.84(18) . . ?
C13 C14 C15 120.9(2) . . ?
C13 C14 H14 119.8(12) . . ?
C15 C14 H14 119.3(12) . . ?
C16 C15 C14 120.5(2) . . ?
C16 C15 H15 121.1(15) . . ?
C14 C15 H15 118.3(15) . . ?
C17 C16 C15 119.5(2) . . ?
C17 C16 H16 119.8(15) . . ?
C15 C16 H16 120.6(15) . . ?
C16 C17 C18 120.4(2) . . ?
C16 C17 H17 120.7(16) . . ?
C18 C17 H17 118.9(16) . . ?
C17 C18 C13 120.9(2) . . ?
C17 C18 H18 123.0(13) . . ?
C13 C18 H18 116.0(13) . . ?
C20 C19 C24 117.77(18) . . ?
C20 C19 C8 123.38(18) . . ?
C24 C19 C8 118.85(17) . . ?
C19 C20 C21 120.4(2) . . ?
C19 C20 H20 119.2(13) . . ?
C21 C20 H20 120.4(13) . . ?
C22 C21 C20 120.5(2) . . ?
C22 C21 H21 123.1(15) . . ?
C20 C21 H21 116.4(16) . . ?
C23 C22 C21 119.8(2) . . ?
C23 C22 H22 118.8(15) . . ?
C21 C22 H22 121.3(15) . . ?
C22 C23 C24 120.4(2) . . ?
C22 C23 H23 120.5(16) . . ?
C24 C23 H23 118.8(16) . . ?
C23 C24 C19 121.1(2) . . ?
C23 C24 H24 120.7(13) . . ?
C19 C24 H24 118.2(13) . . ?
 
loop_
 _geom_torsion_atom_site_label_1
 _geom_torsion_atom_site_label_2
 _geom_torsion_atom_site_label_3
 _geom_torsion_atom_site_label_4
 _geom_torsion
 _geom_torsion_site_symmetry_1
 _geom_torsion_site_symmetry_2
 _geom_torsion_site_symmetry_3
 _geom_torsion_site_symmetry_4
 _geom_torsion_publ_flag
C9 C1 C2 C3 -33.7(3) . . . . ?
C10 C1 C2 C3 -156.2(2) . . . . ?
C8 C1 C2 C3 76.5(3) . . . . ?
C1 C2 C3 C4 7.1(4) . . . . ?
C1 C2 C3 C11 -176.8(3) . . . . ?
C11 C3 C4 C5 179.8(3) . . . . ?
C2 C3 C4 C5 -4.3(5) . . . . ?
C3 C4 C5 C6 -13.3(5) . . . . ?
C4 C5 C6 C9 56.4(3) . . . . ?
C4 C5 C6 C12 175.6(2) . . . . ?
C4 C5 C6 C7 -56.3(3) . . . . ?
C5 C6 C7 C13 -103.0(2) . . . . ?
C9 C6 C7 C13 143.48(18) . . . . ?
C12 C6 C7 C13 24.1(3) . . . . ?
C5 C6 C7 C8 128.4(2) . . . . ?
C9 C6 C7 C8 14.9(2) . . . . ?
C12 C6 C7 C8 -104.4(2) . . . . ?
C13 C7 C8 C19 66.7(2) . . . . ?
C6 C7 C8 C19 -166.07(17) . . . . ?
C13 C7 C8 C1 -163.64(15) . . . . ?
C6 C7 C8 C1 -36.42(19) . . . . ?
C9 C1 C8 C19 173.13(17) . . . . ?
C10 C1 C8 C19 -67.0(2) . . . . ?
C2 C1 C8 C19 58.2(2) . . . . ?
C9 C1 C8 C7 43.30(19) . . . . ?
C10 C1 C8 C7 163.20(17) . . . . ?
C2 C1 C8 C7 -71.7(2) . . . . ?
C10 C1 C9 O1 27.1(3) . . . . ?
C2 C1 C9 O1 -92.7(3) . . . . ?
C8 C1 C9 O1 147.1(3) . . . . ?
C10 C1 C9 C6 -154.2(2) . . . . ?
C2 C1 C9 C6 85.9(2) . . . . ?
C8 C1 C9 C6 -34.2(2) . . . . ?
C5 C6 C9 O1 74.5(3) . . . . ?
C12 C6 C9 O1 -46.5(3) . . . . ?
C7 C6 C9 O1 -168.7(2) . . . . ?
C5 C6 C9 C1 -104.2(2) . . . . ?
C12 C6 C9 C1 134.8(2) . . . . ?
C7 C6 C9 C1 12.6(2) . . . . ?
C8 C7 C13 C14 17.2(3) . . . . ?
C6 C7 C13 C14 -104.3(2) . . . . ?
C8 C7 C13 C18 -162.97(17) . . . . ?
C6 C7 C13 C18 75.6(2) . . . . ?
C18 C13 C14 C15 -0.1(3) . . . . ?
C7 C13 C14 C15 179.76(18) . . . . ?
C13 C14 C15 C16 -0.9(3) . . . . ?
C14 C15 C16 C17 1.0(4) . . . . ?
C15 C16 C17 C18 -0.1(4) . . . . ?
C16 C17 C18 C13 -0.9(3) . . . . ?
C14 C13 C18 C17 1.0(3) . . . . ?
C7 C13 C18 C17 -178.85(18) . . . . ?
C7 C8 C19 C20 43.2(3) . . . . ?
C1 C8 C19 C20 -80.5(2) . . . . ?
C7 C8 C19 C24 -137.56(18) . . . . ?
C1 C8 C19 C24 98.8(2) . . . . ?
C24 C19 C20 C21 0.2(3) . . . . ?
C8 C19 C20 C21 179.42(18) . . . . ?
C19 C20 C21 C22 -0.3(3) . . . . ?
C20 C21 C22 C23 0.3(3) . . . . ?
C21 C22 C23 C24 -0.2(4) . . . . ?
C22 C23 C24 C19 0.0(3) . . . . ?
C20 C19 C24 C23 0.0(3) . . . . ?
C8 C19 C24 C23 -179.33(19) . . . . ?
 
_diffrn_measured_fraction_theta_max    0.908
_diffrn_reflns_theta_full              27.50
_diffrn_measured_fraction_theta_full   0.957
_refine_diff_density_max    0.306
_refine_diff_density_min   -0.197
_refine_diff_density_rms    0.038

#===END
